# Supplementary material
Source: ML conference proceedings conference paper supplement (https://openaccess.thecvf.com/content/WACV2024/html/Kalla_Robust_Feature_Learning_WACV_2024_paper.html)
Supplement: Supplementary file 1 [file Kalla_Robust_Feature_Learning_WACV_2024_supplemental.pdf]

# Robust Feature Learning and Global Variance-Driven Classifier Alignment for Long-Tail Class Incremental Learning (Supplementary Material)

## 1. Illustration of Long-Tail CIL data distributions:

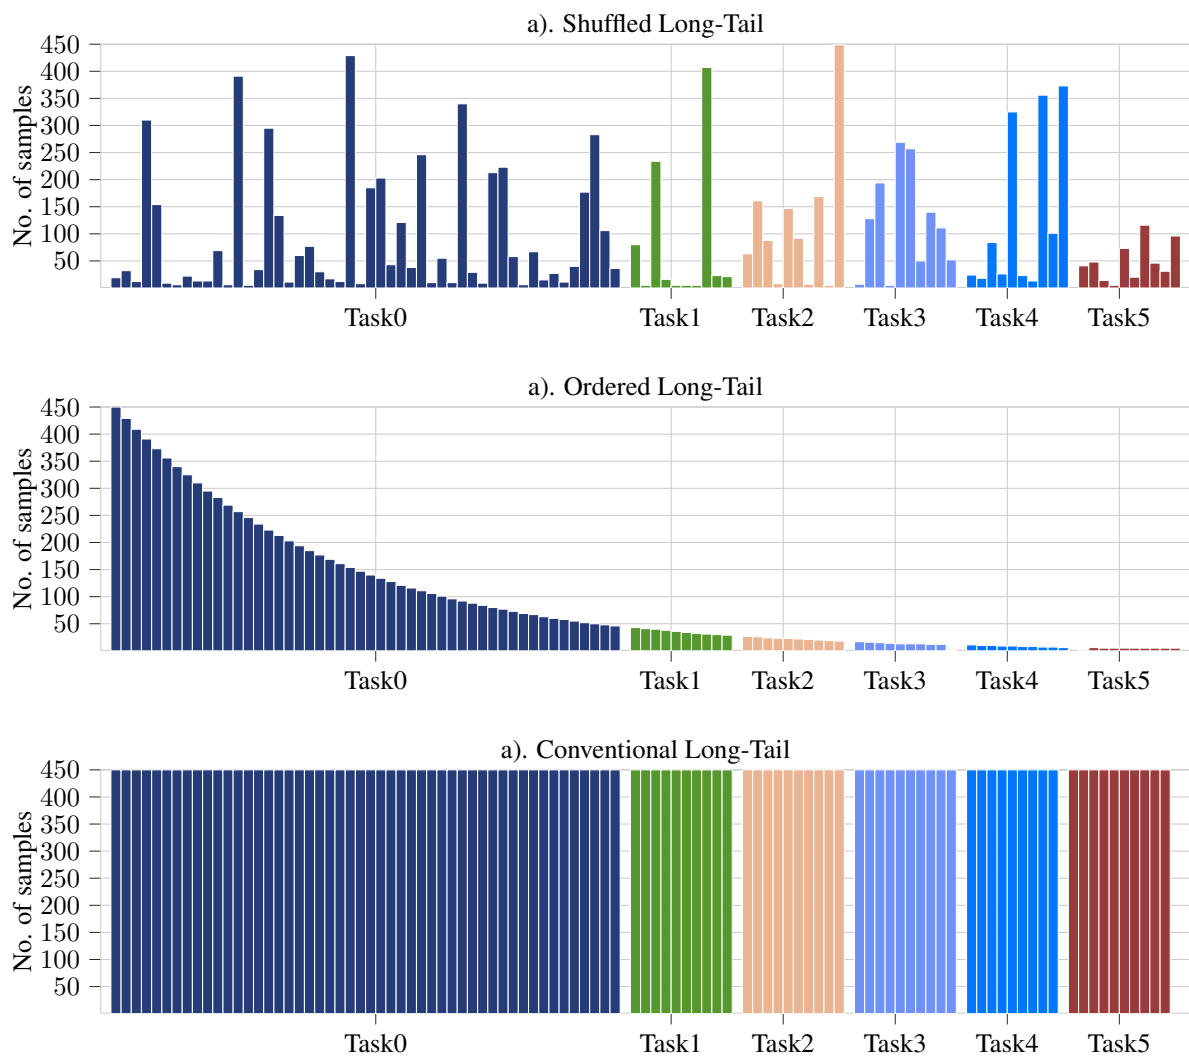

Figure 1. CIFAR100 data distributions for different scenarios in class incremental learning for T=5 setting.

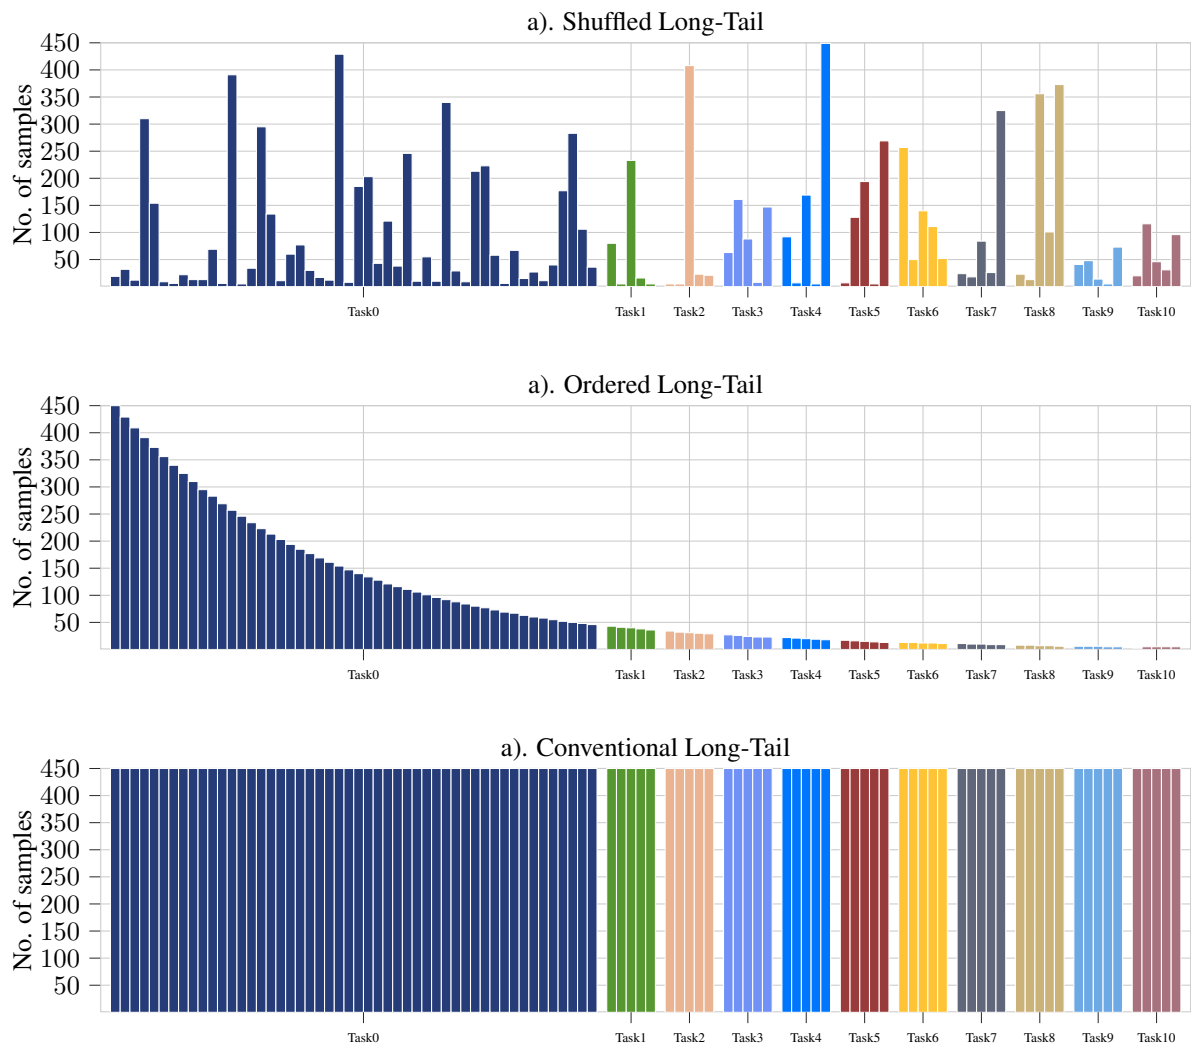

Figure 2. CIFAR100 data distributions for different scenarios in class incremental learning for T=10 setting.
